# Supplementary material for: Tensor Decomposition-Based Unsupervised Feature Extraction Can Identify the Universal Nature of Sequence-Nonspecific Off-Target Regulation of mRNA Mediated by MicroRNA Transfection
Source: Cells. 2018 Jun 4;7(6):54. doi: 10.3390/cells7060054 (PMC6025034; doi:10.3390/cells7060054)
Supplement: Supplementary file 1 [file cells-07-00054-s001.zip]

Archive with 4 entries (4 files):
- cells-306049-graphical.mp4
- Supp.pdf
- Supp.xlsx
- Supp_Figures.pdf
