# Supplementary material for: Tensor Decomposition-Based Unsupervised Feature Extraction Can Identify the Universal Nature of Sequence-Nonspecific Off-Target Regulation of mRNA Mediated by MicroRNA Transfection
Source: Cells. 2018 Jun 4;7(6):54. doi: 10.3390/cells7060054 (PMC6025034; doi:10.3390/cells7060054)
Supplement: Supplementary file 1 [file cells-07-00054-s001.zip › Supp.xlsx]

## Sheet: Sheet1
gene symbol	exp1	exp2	exp3	exp4	exp5	exp6	exp7	exp8	exp9	exp10	exp11
0610038D11RIK
1100001I22RIK
1110007L15RIK
1110008F13RIK
1110020P15RIK
1110054P19RIK
1190005P17RIK
1300001I01RIK
1500032L24RIK
1600029O15RIK
1700022C21RIK
1700029M20RIK
1810006K21RIK
1810022K09RIK
1810046J19RIK
2010005H15RIK
2010310D06RIK
2310008M10RIK
2310016F22RIK
2310056P07RIK
2610009E16RIK
2610205E22RIK
2610507B11RIK
2610524G07RIK
2700094K13RIK
2810417H13RIK
3000002C10RIK
3100003L13RIK
4833427B12RIK
4930517K11RIK
4930570C03RIK
4933434E20RIK
5730416F02RIK
5830434P21RIK
9530080O11RIK
A130040M12RIK
AA536749							○
AARS		○
AASDHPPT		○	○
ABCE1			○
ACAA2
ACAP2			○
ACAT2											○
ACER3		○	○
ACOT13		○	○
ACOT7
ACTA1
ACTA2								○
ACTA2								○
ACTB	○	○	○		○			○	○	○	○
ACTB	○	○	○		○			○	○	○	○
ACTC1								○
ACTG1	○	○	○	○					○	○	○
ACTL6A				○
ACTN1			○
ACTN4			○					○
ACTN4			○					○
ACVR2B			○
ADAM15					○
ADAM9			○
ADAMTS1		○	○
ADAMTS7						○
ADAMTS9											○
ADD3		○	○
ADFP
ADM						○					○
ADSS		○	○
ADTRP		○	○
AEBP1		○	○
AF147412	○			○
AF274932				○
AFTPH		○	○
AGO2		○
AGR2					○
AHNAK		○				○		○
AHNAK		○				○		○
AHR											○
AHSA1											○
AHSA1											○
AIMP1		○	○
AIMP2		○
AIRE
AK006763							○
AK008862							○
AK021804		○	○
AK022628				○
AK024156					○
AK027191				○
AK038173							○
AK047278							○
AK057071				○
AK091931						○
AK130930	○
AK144853							○
AK2			○
AK3
AKAP2		○
AKR1B1					○	○					○
AKR1B10					○	○
AKR1B15					○	○
AKR1B3
AKR1C1					○	○
AKR1C3				○	○	○
AKR1C8P					○
AKT3		○	○
ALAD
ALDH1A1					○	○
ALDH1A3		○	○		○
ALDH1L2		○	○
ALDH7A1			○
ALDOA					○				○	○	○
ALDOA					○				○	○	○
ALG11		○	○
ALG13		○	○
ALG8			○
ALK											○
ALOX5AP		○	○
ALOX5AP		○	○
AMD1				○
AMMECR1		○	○
ANAPC11					○
ANAPC11					○
ANAPC5
ANGPTL4						○
ANGPTL4						○
ANK
ANKH		○	○
ANKIB1			○
ANKRD1								○
ANKRD11			○
ANKRD12			○
ANP32B		○
ANP32E				○
ANTXR2		○	○
ANXA1					○	○			○
ANXA1					○	○			○
ANXA2	○	○	○			○
ANXA2	○	○	○			○
ANXA2P2			○
ANXA4					○
ANXA5
ANXA6				○
ANXA8L1					○
AOF2				○
AP1S1
AP1S2		○
AP2M1					○	○
AP2S1						○
AP2S1						○
AP3S1		○	○
APEX1			○
APEX1			○
APLP2		○	○
APOA1BP				○
APOA1BP				○
APOBEC3A									○	○
APPL2		○	○
APRT
AQP5
ARBP
ARF1
ARF3
ARF4		○	○
ARHGDIA								○
ARHGDIA								○
ARHGDIB		○	○
ARHGEF2		○	○
ARID4B		○	○
ARL6IP				○
ARL6IP1			○
ARL6IP4				○
ARL8B		○	○
ARMC10		○
ARMCX3			○
ARMET
ARNTL2		○	○
ARNTL2-AS1			○
ARPC1B
ARPC2	○		○	○					○	○
ARPC4
ARPC5L				○
AS3MT						○
ASAP1		○	○
ASCC3		○
ASF1B
ASNS		○	○								○
ASPH		○	○	○	○
ASPM			○
ATAD1		○	○
ATF4	○			○		○			○	○
ATF7		○	○
ATG10										○
ATG3				○
ATIC
ATM		○
ATMIN		○	○
ATOX1
ATP11B			○
ATP13A3		○	○
ATP1A1				○				○
ATP1A1				○				○
ATP1B3					○
ATP1B3					○
ATP2A2		○	○
ATP5A1		○
ATP5A1		○
ATP5B			○					○
ATP5B			○					○
ATP5D
ATP5E				○	○	○
ATP5G1
ATP5G2	○			○	○
ATP5G2	○			○	○
ATP5G3		○	○	○	○
ATP5G3		○	○	○	○
ATP5H					○
ATP5H					○
ATP5I				○
ATP5J2
ATP5L		○	○			○
ATP5O				○	○
ATP5O				○	○
ATP6		○	○		○	○
ATP6AP1				○
ATP6V0B
ATP6V0C	○									○
ATP6V0C	○									○
ATP6V0E
ATP6V1A
ATP6V1E1				○
ATP6V1F
ATPIF1	○			○
ATXN10		○	○
AUP1				○
AURKA			○
AURKAIP1	○
AURKAIP1	○
AY029066	○
AY444749					○
AY927536						○
AYTL2				○
AZI2		○	○
A_23_P258108						○
A_24_P109973	○
A_24_P127051	○
A_24_P145787	○
A_24_P186944						○
A_24_P204144						○
A_24_P204604	○
A_24_P238426	○
A_24_P281504	○
A_24_P316074						○
A_24_P323805	○
A_24_P32766					○
A_24_P332471						○
A_24_P341408	○
A_24_P349636						○
A_24_P375599						○
A_24_P409681	○
A_24_P42014						○
A_24_P547010	○
A_24_P631993	○
A_24_P650893	○
A_33_P3241043					○	○
A_33_P3270966						○
A_33_P3275826					○	○
A_33_P3299436					○	○
A_33_P3336038						○
A_33_P3352407						○
A_33_P3370515					○	○
A_33_P3375668						○
A_33_P3381429						○
A_33_P3390873						○
A_33_P3391626						○
A_33_P3396434						○
A_33_P3406702					○
A_33_P3407374					○	○
A_33_P3409553						○
A_33_P3419003						○
A_51_P370934							○
A_52_P1021640							○
A_52_P576678							○
B230118G17RIK
B230369F24RIK
B2M				○					○
B2M				○					○
B3GALT6	○
B4GALT1			○
BACH1		○
BAG1	○
BAP1				○
BASP1	○		○	○					○
BAT1A
BAT2D1				○
BAX
BBX		○	○
BC000845	○
BC012020							○
BC025885							○
BC031441							○
BC036642							○
BC089461							○
BCAS2
BCAT1		○	○
BCL2L1			○
BDP1		○	○
BE368005							○
BEGAIN											○
BEX3									○	○
BF683009							○
BHLHE40			○
BIRC5			○
BIRC5			○
BLVRB				○	○
BMPR1A		○	○
BNC1		○	○
BOD1L1		○	○
BOLA2
BOLA3				○
BPY2IP1				○
BRI3					○
BRI3					○
BRWD3		○	○
BSG
BST2				○
BST2				○
BTBD3									○
BTF3	○		○
BTF3	○		○
BTF3L4		○	○
BTG1
BU956542	○
BUB3			○
BUB3			○
C12ORF4
C12ORF62
C130052I12RIK
C14ORF147
C15ORF21
C15ORF24
C15ORF48
C16ORF7
C17ORF45
C17ORF49
C18ORF23
C19ORF10
C19ORF33
C19ORF37
C1GALT1		○
C1ORF151-NBL1
C1ORF43
C1QA
C1QBP		○		○					○	○
C1QBP		○		○					○	○
C1QC
C20ORF149
C20ORF52
C21ORF59
C22ORF16
C22ORF5
C2ORF74
C3ORF60
C5ORF63
C6ORF108
C6ORF203
C6ORF51
C7ORF21
C7ORF27
C7ORF30
C80049							○
C9ORF32
CAB39		○
CACNG4											○
CALD1		○	○
CALM1		○	○
CALM2		○	○	○
CALM3		○	○
CALM3		○	○
CALR
CALU		○	○
CALY						○
CAMK2N1			○
CAMSAP1		○	○
CAND1
CANX		○	○
CANX		○	○
CAP2			○
CAPG
CAPN2	○				○
CAPRIN2		○	○
CAPZA1
CAR9
CARD10						○
CARHSP1				○
CASC7		○
CAV1	○		○
CAV1	○		○
CBR2
CBR3
CBS									○
CBX1			○
CBX3				○							○
CBX3				○							○
CBX5		○	○
CC2D1A					○
CCDC186		○	○
CCDC59		○
CCDC6					○
CCDC72				○
CCDC72				○
CCDC80			○
CCL2
CCL4
CCL7
CCNA2
CCNB2
CCND1
CCNDBP1			○
CCNI		○	○						○
CCNK		○
CCT2	○
CCT3				○
CCT3				○
CCT4	○
CCT4	○
CCT5				○
CCT5				○
CCT7				○
CD14
CD151					○	○
CD164
CD24					○	○
CD44		○			○
CD46		○	○
CD47		○	○
CD59		○	○
CD63	○	○	○		○	○
CD68
CD70						○
CD81								○
CD81								○
CDC14B				○
CDC20
CDC27		○	○
CDC34				○
CDC37
CDC42EP1				○
CDCA3
CDCA5			○
CDCA8
CDH2											○
CDH3	○
CDIPT
CDK2AP1											○
CDK6		○	○
CDKN1A											○
CDKN2A	○
CDV3				○
CEBPD	○
CEBPG		○	○
CEBPZ			○
CENPF			○
CEP170		○	○
CEP170P1		○	○
CEP95		○	○
CFDP1		○
CFL1		○	○
CFL1		○	○
CFP
CGGBP1		○	○
CHCHD2	○
CHCHD2	○
CHGA											○
CHGB											○
CHMP2A				○
CHMP2B		○	○
CHMP4B				○
CHORDC1				○
CHST1
CIRBP											○
CISD1		○
CITED2
CITED4	○					○
CKAP1
CKB									○	○
CKM								○
CKS1B											○
CKS2			○								○
CLCN7				○
CLDN1		○	○
CLDN12		○	○
CLDN22		○	○
CLIC4		○
CLIC4		○
CLIP1		○	○
CLTC				○
CLU				○				○
CMIP		○	○
CMTM3						○
CMTM7
CNIH
CNIH4				○						○	○
CNN2								○
CNN2								○
CNN3
CNNM2		○
CNOT2		○	○
COA6		○
COASY				○
COCH		○	○
COL18A1					○	○
COL1A1								○
COL1A1								○
COL1A2								○
COL3A1								○
COL3A1								○
COL4A1								○
COL4A1								○
COL4A4
COL5A1
COL5A2								○
COL5A3
COL6A1
COL6A2								○
COL6A2								○
COL6A3
COL7A1				○
COLEC12			○
COMT
CONTIG15935
COPA								○
COPE
COPS2		○	○
COPS5		○
COPZ1				○
COPZ1				○
CORO1A
CORO1C		○	○
COTL1	○			○
COTL1	○			○
COX1		○	○
COX17				○
COX2		○		○	○	○
COX3						○
COX4I1
COX5A
COX5B
COX6A1					○
COX6A1					○
COX6B1					○
COX6C					○
COX6C					○
COX7A2				○					○	○
COX7A2				○					○	○
COX7B									○
COX7C	○				○	○
COX8A				○	○
COX8A				○	○
CP		○
CPE
CPS1									○
CREB5		○	○
CRELD2
CRIP1					○
CRIP2											○
CRIP2											○
CRLF1					○
CRTAP		○	○
CRTC3
CRYBG3		○	○
CSDE1		○	○
CSF1
CSF1R
CSNK1A1		○	○
CSNK1E				○
CSNK2A1		○	○
CSPG4
CSPG6				○
CST3									○	○	○
CST3									○	○	○
CSTB	○				○
CSTB	○				○
CTAG1A						○
CTAG2						○
CTBS		○	○
CTGF		○	○					○
CTHRC1			○
CTNNA1		○	○					○
CTNNA1		○	○					○
CTSB	○
CTSB	○
CTSD
CTSL
CTSS
CTSZ
CTTN					○
CUL4B		○	○
CUTA	○
CWC27		○	○
CXCL1	○					○
CXCL2	○
CXCL5	○
CYB5R3	○
CYBA
CYC1
CYCS				○
CYCS				○
CYFIP1		○	○
CYP2W1					○	○
CYP51A1		○	○
CYR61	○	○			○
CYR61	○	○			○
CYTB					○
D00022	○
D11ERTD333E
D11WSU99E
D12ERTD647E
D3UCLA1
D4WSU53E
D8ERTD738E
DAD1									○
DAD1									○
DAG1								○
DAK				○
DAP
DARS		○	○
DAZAP2
DBI			○		○
DBI			○		○
DBNDD2
DCAF10		○	○
DCAF13		○	○
DCBLD2		○
DCP_22_0					○	○
DCP_22_2					○	○
DCP_22_4						○
DDAH1			○								○
DDB1								○	○	○
DDIT3				○
DDIT3				○
DDIT4		○	○
DDOST
DDR2		○	○
DDT				○
DDX17		○	○
DDX17		○	○
DDX18		○	○
DDX21				○
DDX27				○
DDX39A										○
DDX5				○							○
DDX5				○							○
DDX54
DENND1B					○
DERL1		○	○
DES								○
DESI2		○	○
DHCR7	○
DHX9
DIABLO						○
DICER1		○	○
DKC1				○
DLG1			○
DLST				○
DNAAF5											○
DNM1						○
DNMT1											○
DOK4											○
DPM3										○
DPY19L1			○
DPYSL3						○
DQ574852		○
DRAM2		○	○
DRAP1					○
DSE		○	○
DSG2		○	○
DSP								○
DSTN					○			○
DUT		○	○
DUX4					○	○
DUX4L4						○
DVL1	○
DYNC1H1								○
DYNLL1			○	○						○
DYNLL1			○	○						○
DYNLRB1				○
DYSF		○	○
E1A_R60_A104
E1A_R60_A107
E1A_R60_A22
E1A_R60_N9
EBAG9		○	○
EBNA1BP2		○	○
EBP	○			○
EBPL				○
ECHS1			○	○
ECI1					○
EDEM1
EDF1									○
EEF1A1	○	○	○	○		○		○	○	○
EEF1A1	○	○	○	○		○		○	○	○
EEF1B2					○			○
EEF1B2					○			○
EEF1D	○								○	○
EEF1G	○				○			○
EEF1G	○				○			○
EEF2				○				○
EEF2				○				○
EFCAB14		○
EGFR		○
EGR1		○	○
EHD1	○
EHD1	○
EID1		○	○
EIF1					○	○
EIF1					○	○
EIF2B1
EIF2S2			○
EIF2S3		○	○
EIF3E		○
EIF3M		○
EIF3S12				○
EIF3S2
EIF3S4
EIF3S5				○
EIF3S6				○
EIF3S6				○
EIF3S6IP
EIF3S7
EIF3S8	○
EIF3S8	○
EIF3S9				○
EIF3S9				○
EIF4A1	○
EIF4A2	○
EIF4B		○
EIF4EBP1
EIF4G1
EIF4G2				○
EIF5A
EIF5B		○	○
ELAVL4											○
ELL2	○	○	○
ELOF1
ELOVL1				○
ELOVL1				○
EMC4		○
EMG1
EMILIN2
EML4											○
EMP1
EMP2								○
EMP3
ENC1											○
ENO1	○	○	○	○	○				○	○
ENO3									○
ENSMUST00000001667							○
ENSMUST00000033039							○
ENSMUST00000053151							○
ENSMUST00000062067							○
ENSMUST00000074789							○
ENSMUST00000077435							○
ENSMUST00000077662							○
ENSMUST00000078297							○
ENSMUST00000079662							○
ENSMUST00000079794							○
ENSMUST00000080362							○
ENSMUST00000080763							○
ENSMUST00000082405							○
ENSMUST00000082421							○
ENSMUST00000087063							○
ENSMUST00000087244							○
ENSMUST00000090170							○
ENSMUST00000090782							○
ENSMUST00000093546							○
ENSMUST00000095471							○
ENSMUST00000096279							○
ENST00000238708				○
ENST00000238837				○
ENST00000241967				○
ENST00000244644				○
ENST00000247459				○
ENST00000269619				○
ENST00000270031	○
ENST00000278963				○
ENST00000280755				○
ENST00000282413				○
ENST00000295127				○
ENST00000295471				○
ENST00000295772				○
ENST00000295998				○
ENST00000297437				○
ENST00000297622				○
ENST00000298463				○
ENST00000300719				○
ENST00000301733				○
ENST00000307437	○
ENST00000308739						○
ENST00000333817					○
ENST00000343149	○
ENST00000381105						○
ENST00000395181					○
ENST00000396982					○
ENST00000398740					○
ENST00000402278						○
ENST00000403904					○
ENST00000406053						○
ENST00000406939						○
ENST00000416785					○
ENST00000425409					○
ENST00000427083					○
ENST00000429515					○
ENST00000431607					○
ENST00000434913					○
ENST00000436473					○
ENST00000439811					○
ENST00000440360					○
ENST00000448179						○
ENST00000450472					○
ENST00000454541					○
ENST00000456185					○
ENST00000461060					○
ENST00000461513					○
ENST00000467573					○
ENST00000505751					○
ENST00000534819						○
ENST00000589047					○
EPR-1			○
EPRS		○	○
EPS8		○
ERBB2						○
ERGIC2		○
ERMP1			○
ERO1L		○	○
ERP29
ERRFI1		○	○
ERRFI1		○	○
ESD		○
ESD		○
ESF1		○	○
ESM1		○	○
ETFB					○	○
ETS1		○	○
ETV1		○
ETV6		○	○
EXOSC2					○
EXOSC8
F2R
FABP4
FADD					○
FADS2	○				○
FAM114A1		○	○
FAM115A		○	○
FAM120A		○	○
FAM167A											○
FAM234A											○
FAM32A				○
FAM3C		○	○
FAM46A	○
FAM58A				○
FAM60A		○	○
FAM74A4					○	○
FAM79A				○
FAM80B				○
FAM96A				○
FAM98B									○	○
FAS		○
FASN
FASTK				○
FAU	○			○		○
FAU	○			○		○
FBL					○	○
FBL					○	○
FBXL13		○	○
FBXO39
FBXO45		○
FBXW11		○	○
FCER1G
FCGR3
FCMR											○
FEN1			○
FEN1			○
FHL2	○							○
FIP1L1			○
FJX1		○	○
FKBP11
FKBP1A		○	○
FKBP2					○
FLNA								○
FLNA								○
FN1		○						○
FN1		○						○
FNDC3A		○	○
FNDC3B		○	○
FNIP2			○
FOLR1				○
FOSL1		○
FOXC1	○
FOXP4						○
FRMD6		○	○
FRS2		○	○
FSCN1					○	○
FTH1	○	○	○		○	○		○
FTH1	○	○	○		○	○		○
FTHL12	○
FTL	○	○	○		○
FTL1
FTL2
FUT6					○	○
FUT8		○	○
FXR1		○	○
FXYD2					○
FYTTD1		○	○
GABARAP									○	○
GABARAP									○	○
GAGE2				○
GAGE4				○
GAGE5				○
GAGE6				○
GAGE7				○
GAGE7B				○
GAGE8				○
GAL				○
GAPDH	○	○	○		○	○			○	○	○
GARS			○					○
GART											○
GAS5		○	○			○
GCS1
GCSH				○
GDF15				○	○	○
GE_BRIGHTCORNER
GFPT1		○	○
GIPC1				○
GJA1								○
GLG1
GLO1				○
GLS		○
GLT8D2			○
GLTSCR2	○
GLUD2		○
GNAI2				○		○		○
GNAI3
GNAS		○	○		○
GNAS		○	○		○
GNB1											○
GNB1											○
GNB2
GNB2L1				○
GNB2L1				○
GNG5
GNL2		○	○
GNPDA1				○
GNS
GOLGA8A		○	○
GOLIM4		○	○
GOLT1B		○	○
GPATC4				○
GPBP1L1		○	○
GPC1
GPC2											○
GPI					○
GPI1
GPKOW				○
GPNMB
GPR155					○	○
GPR56						○
GPR89A				○
GPRC5A
GPRC5C					○
GPS1
GPX1
GPX4
GRCC10
GRHPR				○
GRN	○					○
GRN	○					○
GSE1											○
GSN
GSS				○
GSTK1					○						○
GSTM1
GSTM2
GSTM3
GSTO1
GSTP1	○					○			○	○
GSTP1	○					○			○	○
GTDC1		○	○
GTF2I				○
GTF3C1								○
GUK1	○
H1F0
H2-D1							○
H2-D4							○
H2-K1							○
H2-Q1							○
H2-Q10							○
H2-Q2							○
H2-Q5							○
H2-Q7							○
H2-T22							○
H2-T23							○
H2AFJ
H2AFV
H2AFY			○	○
H2AFZ			○	○
H2AFZ			○	○
H2BFS		○	○
H3F3A		○	○	○
H3F3A		○	○	○
H3F3B	○	○	○
H3F3B	○	○	○
H47							○
HADHA		○
HAND1											○
HAX1
HCFC1				○
HCG_17955
HDAC7A				○
HDGF				○					○
HDLBP								○
HECTD1		○
HES4										○
HEXB
HIBADH		○	○
HIBADH		○	○
HIGD1A
HINT1					○
HINT1					○
HINT2				○
HIP2
HIST1H1C			○
HIST1H1E		○	○
HIST1H2AA
HIST1H2AF
HIST1H2AI
HIST1H2AJ			○
HIST1H2AK
HIST1H2BC		○	○
HIST1H2BD			○
HIST1H2BE		○	○
HIST1H2BF		○	○
HIST1H2BG		○	○
HIST1H2BH		○	○
HIST1H2BI		○	○
HIST1H3B			○
HIST1H3D
HIST1H4C				○	○	○
HIST1H4C				○	○	○
HIST2H2AC
HIST2H3C1
HLA-A		○
HLA-B	○
HLA-C	○			○
HLA-E					○
HLA-F				○
HLA-G	○
HMBS
HMGA1			○
HMGA2		○	○
HMGA2		○	○
HMGB1		○	○
HMGB2			○								○
HMGN1				○
HMGN1				○
HMGN2		○	○	○		○
HMGN2		○	○	○		○
HMGN4		○	○
HMOX1	○				○	○
HMP19											○
HN1	○				○
HN1L		○
HNRNPA1		○	○
HNRNPA1L2		○
HNRNPA1P10		○	○
HNRNPA1P33		○
HNRNPA2B1		○	○						○	○
HNRNPA3			○
HNRNPA3P1			○
HNRNPD		○	○
HNRNPDL		○	○
HNRNPF			○
HNRNPH3		○
HNRNPM			○
HNRNPR		○	○
HNRNPU		○	○
HNRNPUL2		○
HNRPA1	○
HNRPA2B1				○
HNRPA2B1				○
HNRPAB				○
HNRPAB				○
HNRPH1				○
HNRPH2				○
HNRPH3				○
HNRPK				○
HNRPM	○
HNRPR				○
HNRPU				○
HNRPU				○
HOXB13					○
HSCB						○
HSD17B4		○	○
HSF1
HSP90AA1	○	○	○		○
HSP90AA1	○	○	○		○
HSP90AA5P				○
HSP90AB1		○	○	○				○
HSP90AB1		○	○	○				○
HSP90B1	○		○		○	○		○
HSPA1A				○
HSPA1B
HSPA4		○
HSPA5
HSPA8		○	○	○				○			○
HSPA8		○	○	○				○			○
HSPA9A
HSPB1					○	○			○
HSPB7								○
HSPB8
HSPD1	○	○
HSPD1	○	○
HSPE1				○
HSPE1				○
HSPE1				○
HSPG2					○	○		○
HTRA1								○
HTRA1								○
HUWE1		○	○					○
IARS		○	○
ICAM1		○	○
ICT1				○
ID1											○
ID2											○
ID3				○							○
ID3				○							○
IDH2								○
IDH3B
IDS		○	○
IER2				○	○
IER3				○
IER3IP1
IFI202B
IFI27				○
IFI27				○
IFI30				○
IFI6	○			○
IFIT1	○			○
IFIT2				○
IFIT3
IFITM1	○
IFITM2			○			○			○
IFITM3	○					○
IFITM7
IGBP1		○	○
IGF1			○
IGF1			○
IGF2BP3		○
IGF2R		○
IGFBP3					○	○
IGFBP4			○
IGFBP6
IGSF4A
IGTP
IKBKAP		○
IL11RA
IL13RA2		○	○
IL18									○	○	○
IL1A		○	○
IL1B		○	○
IL31RA		○	○
IL6ST		○	○
ILF2											○
IMPAD1		○	○
IMPDH2
INHBA		○	○
INIP										○
INSL5
INSM2											○
INTS6		○	○
IPO7		○	○
IQGAP1		○	○
IRF2BP2		○	○
IRGM
IRX3									○
ISG15	○			○		○
ISG15	○			○		○
ISL1											○
ISLR2											○
ITGA2			○
ITGA6		○	○
ITGB1	○	○	○					○			○
ITGB3			○
ITGB4BP
ITGB5
ITM2B											○
ITPA				○
ITPR1		○	○
ITPRIPL2			○
IVNS1ABP		○	○
JAK1		○
JAK1		○
JMJD1C		○	○
JTB
JUB				○
JUND1
KARS				○
KCMF1		○	○
KCTD12		○	○
KDELR2			○
KDELR2			○
KDM1B			○
KHDRBS3											○
KIAA0101				○
KIAA1147		○	○
KIAA1841		○
KIF1C								○
KIF22
KIF5B								○
KIFAP3		○	○
KLF10			○
KLHL24		○	○
KLHL42		○	○
KPNA1		○
KPNA2		○	○
KPNA2		○	○
KRR1			○
KRT18	○				○	○
KRT18P55					○
KRT19	○				○	○
KRT6A					○
KRT7					○
KRT8			○	○	○
KRT81					○	○
KTN1				○
KYNU				○
LAMB3		○	○	○
LAMC1								○
LAMC1								○
LAMC2			○		○
LAMP1	○
LAPTM4B		○	○
LAPTM4B		○	○
LARS		○	○
LARS2
LASP1									○
LASP1									○
LASS2				○
LAT2
LBR										○
LBX1						○
LCE1D						○
LDHA					○						○
LDHA					○						○
LDHB		○		○
LEO1		○	○
LEPREL1	○
LGALS1	○	○	○			○		○
LGALS1	○	○	○			○		○
LGALS3	○
LGALS3BP											○
LGALS3BP											○
LGMN
LILRB4
LIMA1			○
LIMS1		○
LIMS3L		○
LINC00294		○	○
LINC00623			○
LINC00869			○
LINC01138			○
LINC01356					○
LIX1L		○
LMAN1		○	○
LMNA	○
LMNA	○
LMO7		○	○
LNC-BEGAIN-1
LNC-C20ORF96-1
LNC-SERHL2-3
LNC-WWC2-1
LOC100190986			○
LOC100294033		○	○
LOC100506248		○	○
LOC100996668		○	○
LOC100996724		○	○
LOC100996740		○	○
LOC100996761		○	○
LOC101060363		○	○
LOC101928061		○	○
LOC101928615		○	○
LOC101928625		○	○
LOC101928826		○	○
LOC101929087		○	○
LOC101929368		○	○
LOC101929612					○
LOC101929792		○	○
LOC101930416		○	○
LOC102723697			○
LOC102724870		○
LOC103091866			○
LOC194985							○
LOC244512							○
LOC245651							○
LOC279067							○
LOC280121							○
LOC284600					○
LOC333830							○
LOC380687							○
LOC382494							○
LOC384179							○
LOC385319							○
LOC388524	○
LOC399753						○
LOC401317		○	○
LOC433225							○
LOC435337							○
LOC440093	○
LOC441876	○
LOC56628							○
LOC619863							○
LOC619975							○
LOC620480							○
LOC624596							○
LOC624863							○
LOC625603							○
LOC625815							○
LOC626903							○
LOC627004							○
LOC627905							○
LOC630499							○
LOC631366							○
LOC633908							○
LOC637313							○
LOC638803							○
LOC640374							○
LOC640534							○
LOC641192							○
LOC643790	○
LOC643932	○
LOC643960	○
LOC644937	○
LOC644961						○
LOC645693	○
LOC648771						○
LOC649233	○
LOC649915	○
LOC664813							○
LOC666448							○
LOC668299							○
LOC668950							○
LOC670046							○
LOC670106							○
LOC670202							○
LOC670529							○
LOC670811							○
LOC672341							○
LOC673182							○
LOC673334							○
LOC674226							○
LOC674833							○
LOC674918							○
LOC676153							○
LOC727891	○
LOC728026		○	○
LOC729162					○
LOXL1
LOXL2	○							○
LPIN1		○	○
LPL
LRIG2			○
LRPAP1				○
LRRC37A			○
LRRC37A2			○
LRRC37A3			○
LRRC37A4P			○
LRRC58		○	○
LRRC75A-AS1									○	○
LRRD1		○	○
LRRFIP1		○	○
LRRN3											○
LSM14A		○	○
LSM2										○
LSM4			○	○						○
LSM7
LSMD1				○
LSMD1				○
LTBP3
LTV1			○
LUC7L3		○	○
LUZP1		○	○
LXN		○	○
LY6E											○
LY6E											○
LY6K	○				○
LYPLA1		○
LYPLA2
LYZS
LZP-S
M20632							○
M6PR		○	○
M6PR		○	○
M77174							○
MACF1			○
MAGEA7
MAGED1								○
MAGED1								○
MAGOH
MALAT1		○	○					○
MAML1					○	○
MANEA		○	○
MAP1LC3B
MAP2K1IP1
MAP2K2				○						○
MAP2K2				○						○
MAP3K2			○
MAP4					○	○
MAP4K3		○	○
MAP4K4		○	○
MAPK8		○	○
MAPKAP1		○	○
MAPRE1				○
MARCKS		○	○						○	○
MARCKSL1										○
MARS			○
MARS2		○	○
MAST2
MAT2A
MATR3				○
MBNL1		○
MCL1	○	○	○	○
MCL1	○	○	○	○
MCM3
MCM4			○						○		○
MCM4			○						○		○
MCM6
MCM7	○								○	○
MCM7	○								○	○
MCM8									○	○	○
MDH1						○
MDH1						○
MDH2
MDK	○
ME2		○
MED10				○
MED11				○
MED21		○	○
MED28
MEIS3P1		○
MEL13
MELA
MET						○
METAP1		○
METAP2	○	○
METAP2	○	○
METRN					○	○
METTL3		○
METTL5			○
MFGE8
MFSD10											○
MGC27348	○
MGC68323							○
MGC73635							○
MGRN1											○
MGST1				○	○	○
MGST1				○	○	○
MGST3					○
MICAL2			○
MIEN1						○
MIF	○				○	○			○	○
MIF	○				○	○			○	○
MINA		○	○
MIR100HG		○	○
MIR1204		○
MIR1244-1		○	○
MIR1244-2		○	○
MIR1244-3		○	○
MIR1304		○	○
MIR21		○	○
MIR3652			○
MIR4738		○	○
MIR4745			○
MIR612		○	○
MIR6733		○	○
MIR6758			○
MIR6805		○	○
MIR6840			○
MKI67			○
MKI67			○
MKNK2	○
MLEC		○	○					○
MME		○	○
MOB1A		○	○
MPDU1				○
MPHOSPH8			○
MPZL1		○	○
MRGPRF
MRP63
MRPL12										○
MRPL12										○
MRPL13				○
MRPL18											○
MRPL18											○
MRPL23
MRPL27				○
MRPL33
MRPL36
MRPL43
MRPL51				○					○	○
MRPL51				○					○	○
MRPL54
MRPS10		○	○
MRPS15				○
MRPS18B				○
MRPS21				○					○
MRPS6
MRPS6
MS4A7
MSC					○
MSH6											○
MSMP					○
MSN	○					○		○
MT1
MT1A					○	○
MT1B	○				○	○
MT1E						○
MT1G	○
MT1H						○
MT1HL1					○
MT1L	○				○	○
MT1X	○					○
MT2
MT2A	○			○	○	○
MTCH1
MTDH
MTHFD2		○	○
MTIF3		○
MTPN				○
MTPN				○
MTRF1L		○	○
MTRNR2L2					○	○
MTRNR2L6					○	○
MTSS1		○	○
MUC6			○
MVP					○
MX1	○
MXRA7						○
MYBPC3								○
MYD88
MYH10								○
MYH7								○
MYH9				○				○
MYH9				○				○
MYL12A		○	○
MYL12B		○
MYL2								○
MYL3								○
MYL4								○
MYL6
MYL9								○
MYLC2B
MYO18B								○
MYO6		○
MYOF			○
MYOM2								○
MZT2B					○
NACA		○
NACA		○
NADK
NAMPT		○	○
NAP007796-001							○
NAP018080-001							○
NAP018615-001							○
NAP026680-1							○
NAP026710-1							○
NAP027770-1							○
NAP027859-1							○
NAP027922-1							○
NAP027924-1							○
NAP028279-1							○
NAP028543-1							○
NAP028712-1							○
NAP028768-1							○
NAP028769-1							○
NAP029477-1							○
NAP029862-1							○
NAP029896-1							○
NAP030221-1							○
NAP030387-1							○
NAP030482-1							○
NAP031415-1							○
NAP037463-1							○
NAP038884-1							○
NAP045499-1							○
NAP046391-1							○
NAP056541-1							○
NAP058332-1							○
NAP059398-1							○
NAP060054-1							○
NAP061138-1							○
NAP061240-1							○
NAP070792-1							○
NAP070880-1							○
NAP071111-1							○
NAP092480-001							○
NAP092588-001							○
NAP094232-001							○
NAP096498-001							○
NAP101150-1							○
NAP101638-1							○
NAP101988-1							○
NAP102738-1							○
NAP103162-1							○
NAP103812-1							○
NAP108473-1							○
NAP112061-1							○
NAP112575-1							○
NAP112641-1							○
NAP114245-1							○
NAP1L1		○		○
NAP1L1		○		○
NAP1L4
NAPG		○	○
NARS		○	○
NBEAL1						○
NBN		○	○
NBPF10		○	○
NBPF14		○	○
NBPF26		○	○
NBPF9		○	○
NBR1		○	○
NCAM1			○
NCF4
NCK2		○	○
NCL				○
NCL				○
NCOA3		○	○
ND2		○
ND3		○	○
ND4		○	○
ND4L					○
ND6		○
NDRG1		○	○	○	○	○
NDUFA1				○					○	○
NDUFA1				○					○	○
NDUFA13
NDUFA3									○	○
NDUFA4		○				○
NDUFA4		○				○
NDUFA6	○
NDUFA7
NDUFA8									○
NDUFAF3					○
NDUFB1				○
NDUFB2				○					○	○	○
NDUFB2				○					○	○	○
NDUFB4			○
NDUFB6
NDUFB8
NDUFB9	○				○	○
NDUFS3									○
NDUFS5					○	○			○	○
NDUFS7
NEAT1		○	○		○
NEDD4								○
NEDD8				○
NEK2			○
NFE2L2		○	○
NFKBIA						○
NGFRAP1		○	○			○
NGFRAP1		○	○			○
NHP2L1				○
NIFK		○	○
NINJ1					○
NISCH								○
NKTR			○
NKX2-5						○
NLK		○	○
NMD3		○	○
NME1									○	○
NME1									○	○
NME1-NME2			○
NME2	○		○	○	○
NME2	○		○	○	○
NME2P1	○
NME4										○	○
NM_006082				○
NM_013307				○
NM_013798							○
NM_014086				○
NM_014173				○
NM_014886				○
NM_014972				○
NM_015853				○
NM_016047				○
NM_016400				○
NM_016403				○
NM_017841				○
NM_021237				○
NM_021631				○
NM_022717				○
NM_030782				○
NM_032412				○
NM_052871				○
NM_080665				○
NM_139243				○
NM_145294				○
NM_173624				○
NM_173714				○
NM_176827				○
NM_180699				○
NM_181428				○
NM_182793				○
NM_182794				○
NNMT						○
NOA1		○	○
NOL1
NOL11				○
NOL12
NOL4L		○	○
NOLA2				○
NONO		○	○	○				○		○
NOP17				○
NOP56										○
NPC2	○				○
NPC2	○				○
NPDC1				○
NPDC1				○
NPIPB5					○
NPM1	○	○	○
NPM1	○	○	○
NPPA								○
NPPB
NPTN
NPTX2											○
NQO1			○
NR1D2		○
NR2F2		○	○
NRBF2			○
NRIP1		○	○
NRP1		○	○
NRP2		○	○
NSFL1C
NSG1											○
NSUN2				○
NT5C				○
NT5E			○
NUCB2		○	○
NUCKS1				○
NUDCD2				○
NUDT1				○
NUDT3			○
NUP160				○
NUP188				○
NUPR1					○
NUS1		○	○
OAS1				○
OAS1A
OAS1F
OAZ1	○				○	○			○
OAZ1	○				○	○			○
ODC1	○		○	○
OGFR
OGT		○	○
OLFM1									○
OR10S1				○
OSBPL9		○
OSCAR		○	○
OTUD4		○	○
OTUD5				○
OXCT1								○
OXCT1								○
P4HA1			○
P4HB				○	○			○
PA2G4						○
PA2G4						○
PABPC1	○							○
PABPC1	○							○
PABPC2
PABPC4
PAFAH1B1			○
PAICS		○	○
PAICS		○	○
PAIP1									○
PAIP2		○	○
PAK2		○	○
PALM2-AKAP2		○
PAPOLA		○	○
PARD6B		○	○
PARK7	○			○
PARK7	○			○
PATL1		○	○
PBEF1	○
PBX3		○	○
PCBP2				○
PCK2		○	○	○
PCMTD1			○
PCNA
PCOLCE
PCSK1N											○
PCTK1				○
PDAP1				○
PDCD5				○
PDDC1				○
PDE4DIP		○	○
PDGFA		○	○
PDGFA		○	○
PDGFRB
PDIA4
PDIA6
PDLIM5		○	○
PDP1		○
PDPN			○
PDZD7					○
PEA15		○	○								○
PEBP1		○	○	○
PEBP1		○	○	○
PEPD											○
PERP		○
PFDN5
PFN1		○	○						○	○
PFN1		○	○						○	○
PGAM1	○			○		○		○
PGAM1	○			○		○		○
PGD					○
PGD					○
PGK1		○	○		○			○	○
PGK1		○	○		○			○	○
PGRMC1										○
PGRMC2	○
PHF21A		○	○
PHF3		○	○
PHF5A
PHGDH										○
PHGDH										○
PHGDHL1				○
PHLDA1		○	○
PHLDA3
PHOX2B											○
PI3						○
PIAS1			○
PIGT
PIH1D3									○	○
PIK3C2A		○	○
PILRB			○
PJA2		○	○
PKM			○					○
PKM2						○
PKM2						○
PLAU	○
PLEC1
PLEKHA6											○
PLOD1				○
PLOD2		○	○
PLOD3
PLP2
PLS3				○
PLTP											○
PMEPA1		○	○		○
PMP22											○
PNISR		○	○
POLD2									○	○
POLD4					○
POLE3									○
POLR1C			○
POLR1D										○
POLR2A									○	○
POLR2E				○
POLR2E				○
POLR2F										○
POLR2K		○
POLR2K		○
POLR2L	○			○
POLR2L	○			○
POLR3G		○	○
POP5				○
POP5				○
PPA1				○
PPAT		○	○
PPDPF					○
PPDPF					○
PPFIBP1			○
PPGB
PPIA	○	○	○		○	○
PPIA	○	○	○		○	○
PPID		○	○
PPIF	○
PPM1G			○
PPP1CA
PPP1CB			○
PPP1CC			○
PPP1CC			○
PPP1R10		○	○
PPP1R14B				○
PPP1R14B				○
PPP1R16A	○
PPP2R2B											○
PPP3R1		○
PPP6C		○	○
PPP6R3			○
PPTC7		○	○
PQLC2					○	○
PRC1
PRDM2			○
PRDX1	○		○	○	○	○		○
PRDX1	○		○	○	○	○		○
PRDX2											○
PRDX5				○
PRDX6				○
PRICKLE4			○
PRKAA1		○
PRKAB2		○	○
PRKACA				○
PRKAR1A		○						○
PRKAR2B
PRKCI		○	○
PRKCSH
PRKD3		○	○
PRKDC				○
PRMT1
PRMT2
PRNP		○
PRPSAP1
PRR11		○	○
PRR13					○
PRSS15				○
PSAT1		○	○	○
PSD3		○	○
PSMA1
PSMA4
PSMA5				○
PSMA5				○
PSMA7				○					○	○
PSMB1	○				○				○	○	○
PSMB3									○	○
PSMB3									○	○
PSMB4				○
PSMB6				○
PSMB6				○
PSMB7
PSMB8				○
PSMC1										○
PSMC3
PSMC5			○	○
PSMC6				○
PSMD1		○	○
PSMD11										○
PSMD14
PSMD2					○
PSMD2					○
PSMD3
PSMD8
PSME1	○
PSME2	○					○
PTBP1			○
PTEN		○	○
PTENP1		○	○
PTGES				○
PTGES3
PTK6					○
PTK9				○
PTMA		○	○	○					○	○	○
PTMA		○	○	○					○	○	○
PTP4A1				○
PTP4A2
PTPN11				○
PTPN2		○	○
PTPRO		○	○
PTPRS
PTRF	○				○			○
PTRF	○				○			○
PTRH2		○
PTTG1			○
PTTG1			○
PTTG1IP	○
PVT1		○
PXDN								○
PYCR2				○
PYGB								○
QARS									○	○
QPCT		○	○
RAB12			○
RAB1A			○
RAB31									○		○
RAB6A		○	○
RAB7
RABAC1
RABGGTB		○	○
RAC1
RAC2
RACK1								○
RAD21		○
RALY
RAN		○	○			○
RAN		○	○			○
RANGAP1					○
RAP1B				○
RAPGEF4											○
RARRES2
RASL2-9
[truncated: 810 more rows]
